# Supplementary material
Source: PubMed Central journal article supplement (PMC7228412)
Supplement: TBED-67-82-s001.pdf [file TBED-67-82-s001.pdf]

***Mycoplasma bovis* and viral agents associated with the development of  
bovine respiratory disease in adult dairy cows**

Thalita Evani Silva de Oliveira<sup>1,5</sup> Isadora Fernanda Pelaquim<sup>1</sup>, Eduardo Furtado Flores<sup>2</sup>,  
Rodrigo Pelisson Massi<sup>3</sup>, Milton James Jiménez Valdiviezo<sup>1</sup>, Lucienne Garcia Pretto-Giordano<sup>4</sup>,  
Amauri Alcindo Alfieri<sup>3,5</sup> João Paulo Elsen Saut<sup>6</sup>, Selwyn Arlington Headley<sup>1,5,\*</sup>

<sup>1</sup>Laboratory of Animal Pathology, Department of Veterinary Preventive Medicine, Universidade Estadual de Londrina, Paraná, Brazil

<sup>2</sup>Department of Preventive Veterinary Medicine, Universidade Federal de Santa Maria, Rio Grande do Sul, Brazil

<sup>3</sup>Laboratory of Animal Virology, Department of Veterinary Preventive Medicine, Universidade Estadual de Londrina, Paraná, Brazil

<sup>4</sup>Laboratory of Veterinary Microbiology and Infectious Diseases, Department of Preventive Veterinary Medicine, Universidade Estadual de Londrina, Paraná, Brazil

<sup>5</sup>National Institutes of Science and Technology, Dairy Production Chain (INCT-Leite; Brazil), Universidade Estadual de Londrina, Paraná, Brazil.

<sup>6</sup>Large Animal Health Laboratory, Faculty of Veterinary Medicine, Universidade Federal de Uberlândia, Minas Gerais, Brazil.

Running title: Bovine respiratory disease in adult dairy cows

**Corresponding author**

Dr Selwyn A. Headley, Laboratory of Animal Pathology, Department of Veterinary Preventive Medicine, Universidade Estadual de Londrina, Rodovia Celso Garcia Cid, PR 445 Km 380, Campus Universitário, PO Box 10.011, 86057-970, Paraná, Brazil. Phone/Fax: + 55 43 3371-4766. E-mail: [selwyn.headley@uel.br](mailto:selwyn.headley@uel.br)

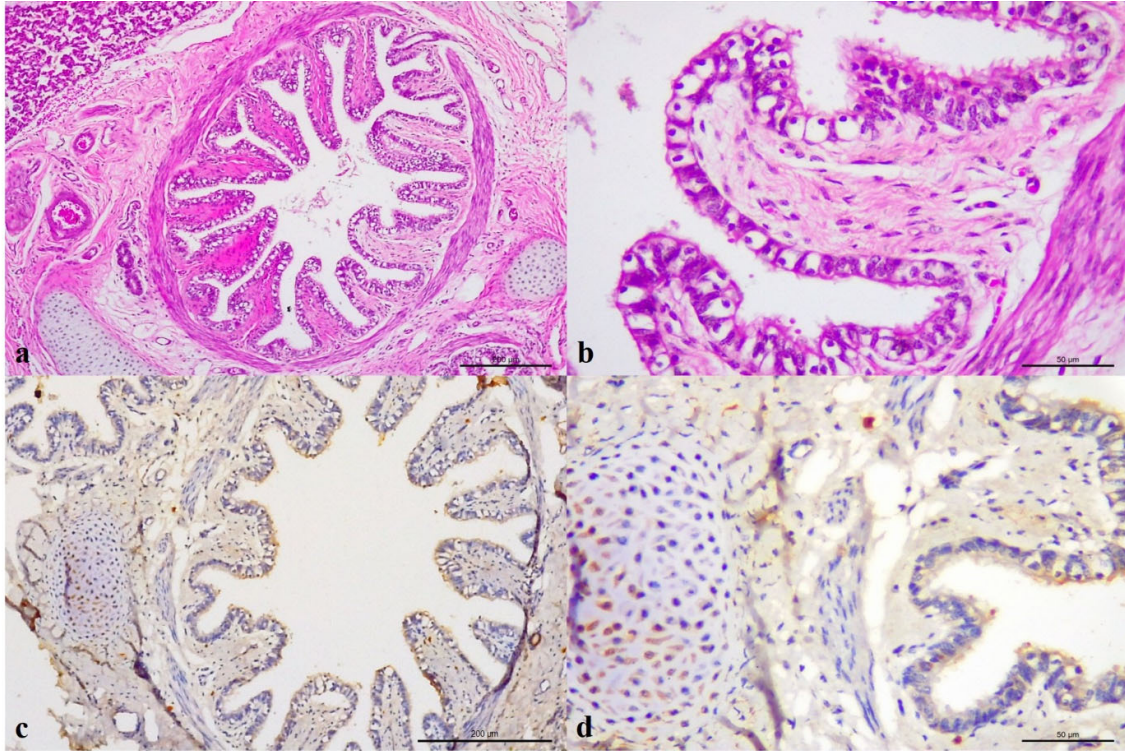

Supplementary File 1. Histopathologic and immunohistochemical findings associated with BVDV-1 in a bovine fetus. (a) Observe ballooning degeneration of the epithelium of the bronchus; (b) closer view of the degenerated epithelium. (c) There is positive immunoreactivity to antigens of BVDV-1 at the chondrocytes of the hyaline cartilage and at the bronchial epithelium; (d) closer view of the positive immunoreactivity at the cartilage and epithelium. Hematoxylin and Eosin stain. Bar, A, 200 µm; B, 50 µm. Immunoperoxidase counterstained with Hematoxylin. Bar, C, 200 µm; D, 50 µm.
